# Supplementary material
Source: PubMed Central journal article supplement (PMC6442343)

*Supplementary Appendix for*

**Early acute anti-HLA antibody-negative microvascular rejection of kidney transplants is associated with preformed IgG antibodies against diverse glomerular endothelial cell antigens**

**Table of Contents**

**SUPPLEMENTARY MATERIALS AND METHODS ..... Page 2**  
**SUPPLEMENTARY DISCUSSION ..... Page 8**  
**SUPPLEMENTARY REFERENCES ..... Page 9**

**SUPPLEMENTARY TABLE 1** Baseline characteristics of 38 patients with early AMVR in the absence of anti-HLA DSAs and 10 KTRs who remained stable during the first year after transplant

**SUPPLEMENTARY TABLE 2..... Antigens that are more immunogenic in patients with AMVR than in stable KTRs (P<0.05)**

**SUPPLEMENTARY FIGURE 1..... CiGENCs acquire an endothelial phenotype after 7 days of culture at 37°C.**

**SUPPLEMENTARY FIGURE 2.....Cytokine stimulation increases HLA expression in CiGENCs.**

**SUPPLEMENTARY FIGURE 3.....Venn diagram illustrating the number of differentially expressed genes between microvascular ECs and macrovascular ECs determined using three statistical methods.**

**SUPPLEMENTARY FIGURE 4.... Validation of antigen expression in micro and macrovascular ECs. (A.)**

## **SUPPLEMENTARY MATERIALS AND METHODS**

### ***Ethics***

The multicenter retrospective study was approved by the French Ministry of Research (CCTIRS# 14031bis, validated 10<sup>th</sup> April 2014) and by the Ethics Committee “*Ile de France II*” of Necker Hospital (IRB registration#: 1072, validated 24<sup>th</sup> March 2014). Each patient included in the present study was asked to provide written informed consent prior to enrollment in the study.

### ***Central histological reading of renal allograft biopsies***

Clinically indicated biopsy specimens were fixed with formalin, acetic acid, and alcohol and embedded in paraffin. Tissue sections were stained with hematoxylin and eosin, Masson’s trichrome, periodic acid–Schiff reagent, and Jones stain for a light microscopy evaluation. Immunohistochemical staining for C4d was systematically performed (rabbit anti-human monoclonal anti-C4d; 1/200 dilution; CliniSciences). Renal allograft biopsies from patients with AMVR but no anti-HLA DSAs and patients with both AMR and anti-HLA DSAs were classified using the updated Banff classification<sup>1,2</sup> by two pathologists (MR and JPDVH) who were blinded to the patient groups.

### ***Donor-specific anti-HLA antibodies***

The presence of circulating anti-HLA-A, -B, -Cw, -DR, -DQ, and -DP DSAs was retrospectively and centrally performed by AC using single-antigen flow bead assays (One Lambda, Canoga Park, CA) on the Luminex® platform<sup>3</sup>. HLA typing of donors and recipients was performed using DNA typing (Innolipa HLA Typing Kit; Innogenetics). Beads showing a normalized MFI>500 were considered positive.

### ***Anti-MICA, anti-AT1R and anti-ETAR antibody assessments***

The presence of anti-MICA antibodies was retrospectively and centrally performed by ACG using flow bead assays (One Lambda, Canoga Park, CA) on the Luminex® platform.

Anti-AT1R and anti-ETAR Abs were measured with dedicated sandwich ELISAs (CellTrend GmbH, Luckenwalde, Germany, distributed by One Lambda) strictly according to the manufacturer’s recommendations. Briefly, a 1:100 serum dilution was added in duplicate to

each well of the microplate and incubated at 4°C for 2 h. After performing the washing steps, the plates were incubated with the horseradish-peroxidase-labeled goat anti-human IgG used for detection for 1 h, washed, substrate was added, the plate was incubated and then the reaction was terminated. A standard curve allowed the optical density signal to be translated into a concentration expressed in units/mL of serum.

### ***Assessment of natural antibodies***

NAb levels were assessed using two separate methods described in a previous study<sup>4</sup>. Briefly, IgGs purified from the patient sera were tested for their reactivity to UV-induced apoptotic Jurkat cells using flow cytometry on a BD LSR Fortessa instrument (BD Biosciences). All samples were diluted 1:2 and assessed using the same instrument settings within the same experiment. As a second method, an ELISA was used to detect NAb reacting to the oxidized lipid epitope MDA. MDA-modified BSA was generated as previously reported<sup>4</sup> and used to coat high-binding 96-well plates (Corning, Kennebunk, ME). A time-resolved fluorometry-based DELFIA was used as a read-out. Briefly, a biotinylated anti-human IgG secondary antibody was used followed by europium-labelled streptavidin for detection. Serum-purified IgGs were tested at a dilution of 1:10 in this assay.

### ***Non-HLA antibody detection***

Sera were tested against a panel of 62 non-HLA antigens in two single-antigen flow bead assays provided by One Lambda Inc. (Canoga Park, CA). One kit contained 57 antigens, and the other one gathered the 5 collagen-bearing beads, as the wash buffer was different for the two assays. Non-HLA antigens bound to microbeads were incubated with patient serum samples (20 µL serum of with 5 µL of beads). After washing, the bead-bound antibodies were detected with an anti-IgG PE-labeled secondary antibody (LS-AB2, One Lambda) and read on a Luminex 200 instrument (Luminex Corporation, TX). Results are presented as MFIs adjusted for non-specific binding using the following formula:  $MFI_{adjusted} = MFI_{(target\ beads)} - MFI_{(negative\ control\ beads)}$ . Positive values for each individual non-HLA antigen were calculated based on the mean MFI of the control group. Samples with an MFI less than the mean+3 SD were classified as negative and samples with an MFI greater than the mean+3 SD were classified as positive.

### ***Endothelial cell crossmatching***

Sera were tested with a custom EC crossmatch assay adapted from a previous study<sup>5</sup> using banked primary macrovascular ECs that were prospectively isolated and stored (DIVAT Sample Biocollection, French Health Ministry project number 02G55), as well as CiGENCs<sup>6</sup>. Cells were activated by adding inflammatory cytokines (100 U/mL each of TNF- $\alpha$  and IFN- $\gamma$ , purchased from R&D Systems) to the medium, followed by an incubation for 48 h to mimic an inflammatory state. After washes with PBS, cells were trypsinized and washed before an incubation with a 1:4 dilution of patient sera in PBS containing 0.05% BSA for 30 minutes. After two additional washes, cells were incubated with an Alexa Fluor<sup>®</sup> 488-conjugated anti-human IgG antibody (AffiniPure F(ab')<sub>2</sub> fragment donkey anti-human IgG (H+L), Interchim) for 20 minutes. Fluorescence was measured using flow cytometry (FACS LSR II<sup>®</sup>, BD Biosciences), and geometric MFIs were calculated using the FlowJo<sup>®</sup> software program. Pooled and individual serum samples from healthy volunteers without detectable anti-HLA antibodies (Etablissement Français du Sang, Nantes) were used as negative controls. A cut-off of a 2-fold increase in the geometric mean value from patients' sera compared with the negative control was established to define reactive sera.

### ***RNA sequencing***

Total RNAs were isolated from the CiGENCs and from banked primary macrovascular ECs obtained from 5 donors using an RNeasy Kit (Qiagen), including a DNase treatment step. RNA quality was assessed using RNA Screen Tape 6000 Pico LabChips with a Tape Station (Agilent Technologies), and the RNA concentration was measured with spectrophotometry using Xpose (Trinean). RNAseq libraries were prepared from 2  $\mu$ g of total RNA using a TruSeq Stranded mRNA LT Sample Prep Kit (Illumina) as recommended by the manufacturer. Half of the oriented cDNAs produced from the poly-A<sup>+</sup> fraction was amplified using PCR (9 or 10 cycles). The RNAseq libraries were sequenced on an Illumina HiSeq2500 platform (paired-end sequencing, 130x130 bases, high-throughput mode). On average, 84 million paired-end reads per library sample were produced with a minimum of 47 million reads obtained for each sample. The RNAseq data are deposited at European Bioinformatics Institute (Annotare; <https://www.ebi.ac.uk/arrayexpress/>) under registration number E-MTAB-7003.

### **Protein array**

A ProtoArray™ Human Protein Microarray v5.1 (Life Technologies, Foster City, CA) containing more than 9,000 protein features were used to profile circulating antibodies in 30 day 0 serum samples, including 20 samples from KTRs with early AMVR without anti-HLA DSAs and 10 samples from KTRs who remained stable over the first year after transplant (used as controls). Single samples were profiled at a 1:500 dilution, and a pairwise analysis between the two groups (Group 1 vs. Group 2) was performed to identify the potential group specificity of the immunogenic antigens. Established protocols (<http://www.invitrogen.com>) were used for sample preparation and data acquisition<sup>7,8</sup>. The data analysis software ProtoArray Prospector 5.2 was used to analyze the signal intensities of fixation.

### **Quantitative PCR**

The mRNAs were isolated using RNeasy Mini Kit (Qiagen, Courtaboeuf, France) and cDNAs were synthesized using a mixture containing RNase inhibitors, a dNTP mixture, random hexamers, an MgCl<sub>2</sub> solution and MultiScribe reverse transcriptase (all from Thermo Fisher). Quantitative PCR reactions were assembled with TaqMan 2x Fast Universal PCR Master Mix (Thermo Fisher) and TaqMan primers and probes, and analyzed on a ViiA7 real-time system using QuantStudio real-time PCR software (Thermo Fisher). Primers and probes for *VEGFR2* (Hs00911700\_m1), *ICAM2* (Hs00609563\_m1), *PECAM1* (Hs01065279\_m1), *VE-cadherin* (Hs00901465\_m1), *CIITA* (Hs00172106\_m1), *B2M* (Hs00187842\_m1), *MBP* (Hs00921945\_m1), *BMPR1A* (Hs00831730\_s1), *EPHB6* (Hs01071144\_m1), *LMOD1* (Hs00201704\_m1) and *HPRT1* (Hs02800695\_m1) were obtained from Thermo Fisher. For *GAPDH*, the following primers and probes were used: sense: 5' CCACATCGCTCAGACACCAT 3', antisense: 5' TGACCAGGCGCCCAATA 3', and probe: 5' FAM-AGTCAACGGATTTGGTC-MGB 3'. Gene expression levels were normalized to GAPDH. For the *18S* RNA, the following primers and probes were used: sense: 5' GCCCGAAGCGTTTACTTTGA 3', antisense: 5' TCCATTATTCCTAGCTGCGGTATC 3', and probe: 5' FAM-AAAGCAGGCCCGAGCCGCC-TAMRA 3'.

### **Flow cytometry**

For endothelial cell phenotyping, cells were stained with PE-conjugated anti-VEGFR2, VioBright-515-conjugated anti-PECAM1, PE-Vio770-conjugated ICAM2, APC-conjugated anti-VE-cadherin, VioBlue-conjugated anti-HLA ABC (all from Miltenyi Biotec) and BV605-conjugated anti-HLA DR (Ozyme) antibodies and analyzed using an LSR Fortessa flow cytometer (BD Biosciences, San Jose, CA) with post-acquisition analysis using Kaluza software (Kaluza 2.1, Beckman Coulter).

### ***Immunofluorescence staining***

Confluent cells on gelatin-coated glass coverslips were fixed with 4% formaldehyde and permeabilized with a solution containing 0.1% Triton X-100 and 3% BSA (Thermo Fisher). Cells were then incubated with the following fluorescent dye-conjugated primary antibodies for 12 h at 4°C: VioBright-515-conjugated anti-PECAM1 and APC-conjugated anti-VE-cadherin (Miltenyi Biotec). For the experiments shown in **Supplementary Figure 2**, cells were incubated with the unconjugated primary antibodies against HLA-A,B,C or HLA-DP,DR,DQ (Ozyme). Unconjugated primary antibody binding was detected using an Alexa Fluor 647-conjugated anti-mouse IgG secondary antibody (Ozyme). Cells were then stained with DAPI and coverslips were mounted using Fluomont™ (Sigma-Aldrich) and examined using a Zeiss confocal microscope (Zeiss Confocal LSM 700). Zen900 software was used to generate representative images and ImageJ software (Java) was used to analyze the data.

### ***Western blot***

Cells were lysed in RIPA buffer containing protease and phosphatase inhibitors (PIC cocktail, Sigma-Aldrich). Cell lysates (20 µg) were resolved by SDS-PAGE (12%), and proteins were transferred to PVDF membranes (Amersham, Little Chalfont, UK) using a Trans-Blot SD semi-dry electrophoretic transfer cell (Bio-Rad, Marne-la-Coquette, France). Immunoblotting was performed using the following primary antibodies at dilution 1:1000: anti-LMOD1, anti-MBP (clone 2H9), anti-BMP1A (clone 4B7B2) from Thermo Fisher Scientific (Rockford, IL, USA) and anti-GAPDH (sc-32233) from Santa Cruz Biotechnology (Dallas, TX, USA). Antibody-bound proteins were revealed using appropriate peroxidase-conjugated secondary antibodies and detected using an enhanced chemiluminescence (ECL) kit (Amersham) and luminescent image analyzer LAS-4000 (Fujifilm, Tokyo, Japan).

### ***Statistical analysis***

Protein array data were analyzed using ProtoArray™ Prospector software (Life Technologies). A mean increase in the signal intensity greater than 2 and a P value less than 0.05 were considered significant. The normalized average signal of fixation was used for the heat map representation of the protein array data.

For RNA sequencing data, FASTQ files were mapped to the ENSEMBL [Human (GRCh38/hg38)] reference sequence using “Hisat2” and counted with “featureCounts” from the “Subread” R package. Read count normalizations and group comparisons were performed using three independent and complementary methods, namely, Deseq2, edgeR, and LimmaVoom, and the results of each analysis were compared and grouped. The results were then filtered at a P value < 0.05 and a fold change of 1.2. The average linkage clustering analysis was implemented in the Cluster 3.0 program and Java Tree View 1.1.6r4 software.

Clustering analyses were performed with hierarchical clustering using the Spearman correlation similarity measure and average linkage algorithm. Heat maps were created with the R package ctc: Cluster and Tree Conversion (<http://www.r-project.org/>) and images were created using Java Treeview software<sup>9</sup> to obtain a general overview of the data in terms of the within-array distributions of signals and the between-sample variability.

The R packages “res.pca” and “fviz\_pca\_ind” were used to process the matched data from the protein array and RNAseq and to perform a PCA.

The overall scoring included the frequency of responses in the patients with AMVR compared with the stable patient group and included the relative strength of reactivity observed, as previously described<sup>10</sup>.

## SUPPLEMENTARY DISCUSSION

In this study, we assessed the presence of unknown AECAs in sera from KTRs. These unknown AECAs specifically target microvascular endothelial antigens. We performed an integrated analysis combining the serological responses of patients with AMVR and stable KTRs with the microvascular EC-specific mRNA expression profiles to identify antigens of interest. The top identified antigens were recognized by greater than 30% of patients with AMVR. The antigen with the highest score in patients with AMVR was ZG16B. This antigen was immunogenic in 90.9% of patients with AMVR compared with 33.3% of stable KTRs. Interestingly, ZG16B is a protein identified in urinary exosomes<sup>11</sup>. Exosomes originate as internal vesicles of multivesicular bodies and are released into the extracellular environment after fusion with the plasma membrane. Urinary exosomes, which contain proteins, lipids and RNAs, are produced by podocytes and potentially ECs in glomeruli. The production of some autoantibodies (such as anti-perlecan) that contribute to rejection in organ transplant recipients was recently shown to be triggered by exosome-like vesicles<sup>12</sup>.

The second highest antigen was leiomodulin-1 (LMOD1). It was immunogenic in 68% of patients with AMVR, with twice the cut-off intensity compared with 25% of stable KTRs. Intriguingly, autoantibodies targeting LMOD1 were recently reported to be more abundantly detected in the sera from patients with nodding syndrome, an autoimmune epileptic disorder, than in unaffected controls. Thus, the authors showed that anti-LMOD1 antibodies are directly neurotoxic in an *in vitro* setting<sup>13</sup>. The potential deleterious effects of anti-LMOD1 antibodies on microvascular ECs could participate in microvascular lesions but remains to be assessed in the kidney transplant context.

We identified three other interesting antigens, namely, myelin basic protein (MBP), transglutaminase 2 (TGM2) and pleckstrin homology domain-containing adapter protein (PLEKHA1), which are all associated with the development of autoantibodies in autoimmune diseases. Anti-MBP Abs are deleterious in patients with multiple sclerosis, whereas anti-PLEKHA1 Abs contribute to type 1 diabetes and anti-TGM2 Abs are involved in celiac disease. In patients with multiple sclerosis, an autoimmune neurodegenerative disease leading to the destruction of the myelin sheath, the B cell-mediated contribution is important<sup>14</sup>. Thus, autoantibodies targeting MBP have been proposed as biomarkers for determining the clinical prognosis<sup>15</sup>. Moreover, anti-MBP Abs have also been detected in a murine model of



multiple sclerosis<sup>16</sup>. In patients with type 1 diabetes (TD1), the genes in the HLA region constitute the most important genetic risk, whereas other non-HLA genes also contribute to the development of autoantibodies. Sharma and colleagues<sup>17</sup> recently discovered that the PLEAKHA1 region presents a single nucleotide polymorphism (SNP) that is strongly correlated with T1D. In celiac disease, a long-term autoimmune disorder primarily affecting the small intestine, IgA antibodies targeting the endomysium are autoantigens that play a major role in the pathogenesis of the disease. Interestingly, Dieterich and colleagues identified tissue TGM2 as the endomysial autoantigen<sup>18</sup>.

In conclusion, in the present study, we developed a homemade endothelial crossmatch assay and identified a common IgG response in sera from patients with AMVR that is specifically directed against constitutively expressed antigens of microvascular glomerular cells. Protein arrays and RNAseq were used to identify 857 antigenic targets of these AECAs. The development of an ELISA for the routine testing of each of these AECAs is not a conceivable solution, and thus *in vitro* cell-based assays are needed to assess the presence of AECAs. Finally, several of these AECAs are already known to function as autoantibodies involved in autoimmune disorders, suggesting a potential direct effect of AECAs on microvascular injury.

#### **SUPPLEMENTARY REFERENCES**

1. Haas M, Sis B, Racusen LC, Solez K, Glotz D, Colvin RB, *et al.*: Banff 2013 meeting report: inclusion of c4d-negative antibody-mediated rejection and antibody-associated arterial lesions. *Am J Transplant*, 14: 272-283, 2014.
2. Loupy A, Haas M, Solez K, Racusen L, Glotz D, Seron D, *et al.*: The Banff 2015 Kidney Meeting Report: Current Challenges in Rejection Classification and Prospects for Adopting Molecular Pathology. *Am J Transplant*, 17: 28-41, 2017.
3. Lefaucheur C, Loupy A, Hill GS, Andrade J, Nochy D, Antoine C, *et al.*: Preexisting donor-specific HLA antibodies predict outcome in kidney transplantation. *J Am Soc Nephrol*, 21: 1398-1406, 2010.
4. See SB, Clerkin KJ, Kennel PJ, Zhang F, Weber MP, Rogers KJ, *et al.*: Ventricular assist device elicits serum natural IgG that correlates with the development of primary graft dysfunction following heart transplantation. *J Heart Lung Transplant*, 36: 862-870, 2017.

5. Canet E, Devalliere J, Gerard N, Karam G, Giral M, Charreau B, *et al.*: Profiling posttransplant circulating antibodies in kidney transplantation using donor endothelial cells. *Transplantation*, 93: 257-264, 2012.
6. Satchell SC, Tasman CH, Singh A, Ni L, Geelen J, von Ruhland CJ, *et al.*: Conditionally immortalized human glomerular endothelial cells expressing fenestrations in response to VEGF. *Kidney Int*, 69: 1633-1640, 2006.
7. Mattoon D, Michaud G, Merkel J, Schweitzer B: Biomarker discovery using protein microarray technology platforms: antibody-antigen complex profiling. *Expert Rev Proteomics*, 2: 879-889, 2005.
8. Sboner A, Karpikov A, Chen G, Smith M, Mattoon D, Freeman-Cook L, *et al.*: Robust-linear-model normalization to reduce technical variability in functional protein microarrays. *J Proteome Res*, 8: 5451-5464, 2009.
9. Saldanha AJ: Java Treeview--extensible visualization of microarray data. *Bioinformatics*, 20: 3246-3248, 2004.
10. Gnjatic S, Wheeler C, Ebner M, Ritter E, Murray A, Altorki NK, *et al.*: Seromic analysis of antibody responses in non-small cell lung cancer patients and healthy donors using conformational protein arrays. *J Immunol Methods*, 341: 50-58, 2009.
11. Prunotto M, Farina A, Lane L, Pernin A, Schifferli J, Hochstrasser DF, *et al.*: Proteomic analysis of podocyte exosome-enriched fraction from normal human urine. *J Proteomics*, 82: 193-229, 2013.
12. Dieude M, Bell C, Turgeon J, Beillevaire D, Pomerleau L, Yang B, *et al.*: The 20S proteasome core, active within apoptotic exosome-like vesicles, induces autoantibody production and accelerates rejection. *Sci Transl Med*, 7: 318ra200, 2015.
13. Johnson TP, Tyagi R, Lee PR, Lee MH, Johnson KR, Kowalak J, *et al.*: Nodding syndrome may be an autoimmune reaction to the parasitic worm *Onchocerca volvulus*. *Sci Transl Med*, 9, 2017.
14. Archelos JJ, Storch MK, Hartung HP: The role of B cells and autoantibodies in multiple sclerosis. *Ann Neurol*, 47: 694-706, 2000.
15. Berger T, Rubner P, Schautzer F, Egg R, Ulmer H, Mayringer I, *et al.*: Antimyelin antibodies as a predictor of clinically definite multiple sclerosis after a first demyelinating event. *N Engl J Med*, 349: 139-145, 2003.

16. Fritz RB, Chou CH, McFarlin DE: Induction of experimental allergic encephalomyelitis in PL/J and (SJL/J x PL/J)F1 mice by myelin basic protein and its peptides: localization of a second encephalitogenic determinant. *J Immunol*, 130: 191-194, 1983.
17. Sharma A, Liu X, Hadley D, Hagopian W, Chen WM, Onengut-Gumuscu S, *et al.*: Identification of non-HLA genes associated with development of islet autoimmunity and type 1 diabetes in the prospective TEDDY cohort. *J Autoimmun*, 2018.
18. Dieterich W, Ehnis T, Bauer M, Donner P, Volta U, Riecken EO, *et al.*: Identification of tissue transglutaminase as the autoantigen of celiac disease. *Nat Med*, 3: 797-801, 1997.

**Supplementary Table 1:** Baseline characteristics of 38 patients with early AMVR in the absence of anti-HLA DSAs and 10 KTRs who remained stable during the first year after transplant

| Variables                                                 | Patients with AMVR without anti-HLA DSAs, N=38 | Stable patients, N=10 | P       |
|-----------------------------------------------------------|------------------------------------------------|-----------------------|---------|
| <b>Recipient characteristics</b>                          |                                                |                       |         |
| Male, n (%)                                               | 25 (65.8)                                      | 9 (90.0)              | 0.18    |
| Age at transplantation, mean±SD, yrs                      | 43.0±14.3                                      | 50.3±15.7             | 0.24    |
| Cause of end-stage renal disease, n (%)                   |                                                |                       |         |
| Glomerulonephritis                                        | 10 (26.3)                                      | 1 (10.0)              | 0.41    |
| Diabetes                                                  | 6 (15.8)                                       | 0 (0.0)               | 0.32    |
| Cystic/hereditary/congenital                              | 7 (18.4)                                       | 4 (40.0)              | 0.21    |
| Secondary glomerulonephritis                              | 3 (7.9)                                        | 1 (10.0)              | 1.00    |
| Hypertension                                              | 2 (5.3)                                        | 0 (0.0)               | 1.00    |
| Interstitial nephritis                                    | 3 (7.9)                                        | 1 (10.0)              | 0.28    |
| Miscellaneous conditions                                  | 2 (5.38)                                       | 1 (10.0)              | 0.41    |
| Neoplasm                                                  | 0 (0.0)                                        | 0 (0.0)               | 1.00    |
| Etiology uncertain                                        | 5 (13.2)                                       | 2 (20.0)              | 0.63    |
| Duration of dialysis before transplantation, mean±SD, yrs | 3.9±4.4                                        | 4.2±3.8               | 0.59    |
| Previous transplantation, n (%)                           | 11 (28.9)                                      | 1 (10.0)              | 0.42    |
| <b>Transplant variables</b>                               |                                                |                       |         |
| Donor age, mean±SD, yrs                                   | 50.4±12.6                                      | 50.7±19.9             | 0.81    |
| Deceased donor, n (%)                                     | 28 (73.7)                                      | 6 (60.0)              | 0.45    |
| Male donor, n (%)                                         | 17 (44.7)                                      | 7 (70.0)              | 0.29    |
| Cold ischemia time <sup>a</sup> , mean±SD, hrs            | 19.1±7.0                                       | 21.7±8.6              | 0.28    |
| Preformed anti-HLA abs with an MFI>500, n (%)             | 19 (50.0)                                      | 3 (30.0)              | 0.66    |
| Delayed graft function, n (%)                             | 18 (47.3)                                      | 3 (30.0)              | 0.48    |
| Number of post-transplant hemodialysis session, mean±SD   | 2.5±4.2                                        | 0.0±0.0               | 0.03    |
| <b>Immunosuppressive protocol</b>                         |                                                |                       |         |
| Induction therapy, n (%)                                  | 38 (100.0)                                     | 10 (100.0)            | 1.00    |
| Basiliximab/Thymoglobuline®, n (%)                        | 33 (86.8)/5 (13.2)                             | 9 (90.0)/1 (10.0)     | 1.00    |
| Calcineurin inhibitor-based therapy, n (%)                | 37 (97.4)                                      | 9 (90.0)              | 1.00    |
| Cyclosporine/Tacrolimus, n (%)                            | 11 (28.9)/26 (68.4)                            | 1 (10.0)/8 (80.0)     | 0.34    |
| Purine synthesis inhibitor, n (%)                         | 37 (93.9)                                      | 5 (50.0)              | 0.0002  |
| mTOR inhibitor, n (%)                                     | 0 (0.0)                                        | 6 (60.0)              | <0.0001 |
| Steroid, n (%)                                            | 37 (97.4)                                      | 10 (100.0)            | 1.00    |

<sup>a</sup> in recipients of transplants from deceased donors only

**Supplementary Table 2: Antigens that are more immunogenic in patients with AMVR than in stable KTRs (P<0.05)**

| Protein Locus | Percentage   |            | Mean Value   |            | P Value    | Description                                                                                   |
|---------------|--------------|------------|--------------|------------|------------|-----------------------------------------------------------------------------------------------|
|               | Stable Group | AMVR Group | Stable Group | AMVR Group |            |                                                                                               |
| BC001135.1    | 8.33%        | 45.46%     | 1396.80531   | 1723.21153 | 0.01173958 | transient receptor potential cation channel, subfamily M, member 8 (TRPM8)                    |
| BC001755.1    | 25%          | 68.18%     | 8417.42279   | 16045.3644 | 0.01309345 | leiomodin-1                                                                                   |
| BC002758.1    | 8.33%        | 50%        | 1356.8921    | 2030.83847 | 0.00614931 | adenosine deaminase, tRNA-specific 1 (ADAT1)                                                  |
| BC002955.1    | 41.67%       | 77.27%     | 2757.81706   | 3461.10623 | 0.03870862 | Ubiquitin-specific peptidase 2 (USP2)                                                         |
| BC003398.1    | 8.33%        | 45.46%     | 1906.91261   | 3120.22664 | 0.01173958 | MOB1, Mps one binder kinase activator-like 1B (yeast) (MOBK1B)                                |
| BC007102.1    | 8.33%        | 36.36%     | 1001.27233   | 1246.26502 | 0.0380784  | cell differentiation protein RCD1 homolog                                                     |
| BC008435.1    | 41.67%       | 81.82%     | 2013.91388   | 3387.37465 | 0.01839011 | peroxiredoxin 3 (PRDX3)                                                                       |
| BC011600.1    | 33.33%       | 95.46%     | 35082.1649   | 42801.6293 | 5.89E-05   | cDNA clone IMAGE:3050953, **** WARNING: chimeric clone ****                                   |
| BC011781.2    | 58.33%       | 95.46%     | 7076.73332   | 4436.9737  | 0.00766284 | chromosome 9 open reading frame 37 (C9orf37)                                                  |
| BC012381.1    | 16.67%       | 77.27%     | 1701.26378   | 2337.33378 | 0.01161727 | neuropilin and tolloid-like protein 2                                                         |
| BC014020.1    | 58.33%       | 95.46%     | 12946.5971   | 13466.3071 | 0.00766284 | BAI1-associated protein 2 (BAIAP2)                                                            |
| BC014394.1    | 25%          | 63.64%     | 4787.05277   | 7693.77217 | 0.02508746 | A.T hook DNA-binding motif-containing protein 1                                               |
| BC014667.1    | 16.67%       | 72.73%     | 56985.0598   | 67019.5845 | 0.00109945 | immunoglobulin heavy constant gamma 1 (G1m marker) (IGHG1)                                    |
| BC014975.1    | 25%          | 59.09%     | 1364.98021   | 1944.52892 | 0.04457771 | family with sequence similarity 136, member A (FAM136A)                                       |
| BC014991.1    | 33.33%       | 86.36%     | 55973.8119   | 65219.8809 | 0.00165721 | N-methylpurine-DNA glycosylase (MPG)                                                          |
| BC016381.1    | 16.67%       | 72.73%     | 55040.7019   | 64792.9392 | 0.00109945 | immunoglobulin heavy constant mu (IGHM)                                                       |
| BC017968.1    | 8.33%        | 59.09%     | 1267.5451    | 1901.91689 | 0.01116585 | solute carrier family 16, member 10 (aromatic amino acid transporter) (SLC16A10)              |
| BC019337.1    | 33.33%       | 81.82%     | 51446.6321   | 56255.4887 | 0.00484443 | immunoglobulin heavy constant gamma 1 (G1m marker) (IGHG1)                                    |
| BC022362.1    | 33.33%       | 86.36%     | 53126.5594   | 61125.3437 | 0.00165721 | cDNA clone MGC:23888 IMAGE:4704496, complete cds                                              |
| BC023144.1    | 16.67%       | 54.55%     | 2513.12309   | 7976.44762 | 0.02087528 | SWI/SNF-related matrix-associated actin-dependent regulator of chromatin subfamily A member 5 |
| BC025314.1    | 8.33%        | 77.27%     | 52856.3307   | 63201.3546 | 3.33E-05   | immunoglobulin heavy constant gamma 1 (G1m marker) (IGHG1)                                    |
| BC026038.1    | 16.67%       | 72.73%     | 54642.5423   | 64325.87   | 0.00109945 | Ig gamma-1 chain C region                                                                     |
| BC026070.2    | 16.67%       | 50%        | 1010.45279   | 2885.35209 | 0.03689584 | tubby like protein 2 (TULP2)                                                                  |
| BC030814.1    | 8.33%        | 90.91%     | 26297.2838   | 32756.25   | 3.66E-07   | immunoglobulin kappa variable 1-5 (IGKV1-5)                                                   |

|            |        |        |            |            |            |                                                                                                             |
|------------|--------|--------|------------|------------|------------|-------------------------------------------------------------------------------------------------------------|
| BC032372.1 | 8.33%  | 36.36% | 659.660811 | 1569.44368 | 0.0380784  | Ral GEF with PH domain and SH3 binding motif 1 (RALGPS1)                                                    |
| BC032416.1 | 8.33%  | 36.36% | 910.095187 | 1948.35423 | 0.0380784  | serine/arginine repetitive matrix 2 (SRRM2)                                                                 |
| BC032451.1 | 16.67% | 77.27% | 47974.5559 | 56698.1655 | 0.00041408 | cDNA clone MGC:40426 IMAGE:5178085, complete cds                                                            |
| BC033178.1 | 16.67% | 72.73% | 54148.5147 | 63741.6112 | 0.00109945 | immunoglobulin heavy constant gamma 3 (G3m marker) (IGHG3)                                                  |
| BC033689.1 | 25%    | 77.27% | 1991.98142 | 2690.84563 | 0.01161727 | MARVEL domain containing 2 (MARVELD2)                                                                       |
| BC033708.1 | 33.33% | 77.27% | 8233.78203 | 5686.0683  | 0.01161727 | Ral GEF with PH domain and SH3 binding motif 1 (RALGPS1)                                                    |
| BC033766.1 | 8.33%  | 36.36% | 3128.99802 | 4104.96661 | 0.0380784  | NADH dehydrogenase (ubiquinone) flavoprotein 3, 10kDa (NDUFV3)                                              |
| BC036184.1 | 16.67% | 50%    | 2042.66279 | 2597.21201 | 0.03689584 | tropomodulin-2                                                                                              |
| BC036767.1 | 25%    | 63.64% | 2701.26286 | 3426.03477 | 0.02508746 | RIB43A domain with coiled-coils 1 (RIBC1)                                                                   |
| BC037854.1 | 8.33%  | 36.36% | 624.348659 | 1294.67744 | 0.0380784  | dynein, cytoplasmic 1, intermediate chain 1 (DYNC1I1)                                                       |
| BC039895.1 | 16.67% | 54.55% | 4798.84974 | 8691.82814 | 0.02087528 | breast cancer anti-estrogen resistance 3 (BCAR3)                                                            |
| BC042193.1 | 16.67% | 50%    | 1707.73531 | 2311.19213 | 0.03689584 | G patch domain containing 2 (GPATCH2)                                                                       |
| BC047536.1 | 16.67% | 54.55% | 28924.8231 | 35195.0396 | 0.02087528 | sciellin (SCEL)                                                                                             |
| BC048299.1 | 41.67% | 77.27% | 5120.44732 | 8973.86743 | 0.03870862 | spermatogenesis-associated, serine-rich 2 (SPATS2)                                                          |
| BC051733.1 | 33.33% | 72.73% | 2679.48847 | 3934.83874 | 0.02416484 | leucine zipper protein 1, mRNA (cDNA clone MGC:51018 IMAGE:4838475), complete cds                           |
| BC053984.1 | 33.33% | 77.27% | 55974.4539 | 60117.9603 | 0.01161727 | immunoglobulin heavy variable 4-31 (IGHV4-31)                                                               |
| BC054893.1 | 8.33%  | 72.73% | 8848.6302  | 10373.7716 | 1.00E-04   | immunoglobulin lambda variable 2-14 (IGLV2-14)                                                              |
| BC056508.1 | 8.33%  | 36.36% | 915.224054 | 1208.37966 | 0.0380784  | variable charge, Y-linked 1B (VCY)                                                                          |
| BC059405.1 | 33.33% | 68.18% | 3334.35655 | 3249.13179 | 0.04507746 | transducin-like enhancer protein 4                                                                          |
| BC059947.1 | 33.33% | 77.27% | 6843.28379 | 9489.84091 | 0.01161727 | Chondrosarcoma-associated gene 1 (CSAG1)                                                                    |
| BC062336.1 | 66.67% | 95.46% | 53450.5972 | 57808.4919 | 0.02955665 | immunoglobulin heavy constant gamma 1 (G1m marker), mRNA (cDNA clone MGC:71315 IMAGE:6300554), complete cds |
| BC062732.1 | 16.67% | 72.73% | 53095.6339 | 62502.2843 | 0.00109945 | Ig kappa chain C region                                                                                     |
| BC066642.1 | 16.67% | 72.73% | 49214.3539 | 57543.3265 | 0.00109945 | immunoglobulin heavy constant gamma 1 (G1m marker), mRNA (cDNA clone MGC:71306 IMAGE:5451018), complete cds |
| BC067091.1 | 33.33% | 72.73% | 51378.4987 | 54052.6298 | 0.02416484 | immunoglobulin heavy constant gamma 1 (G1m marker), mRNA (cDNA clone MGC:71316 IMAGE:6301214), complete cds |
| BC067226.1 | 16.67% | 68.18% | 24404.4005 | 27781.4327 | 0.0025987  | immunoglobulin kappa constant, mRNA (cDNA clone MGC:72070 IMAGE:30349629), complete cds                     |

|                    |        |        |            |            |            |                                                                                                                                                               |
|--------------------|--------|--------|------------|------------|------------|---------------------------------------------------------------------------------------------------------------------------------------------------------------|
| BC069020.1         | 8.33%  | 81.82% | 25327.3334 | 31315.2871 | 9.52E-06   | immunoglobulin heavy constant gamma 1 (G1m marker), mRNA (cDNA clone MGC:78608 IMAGE:6214622), complete cds                                                   |
| BC070361.1         | 8.33%  | 50%    | 34591.1579 | 38146.3129 | 0.00614931 | immunoglobulin kappa constant, mRNA (cDNA clone MGC:88369 IMAGE:30352586), complete cds                                                                       |
| BC072419.1         | 66.67% | 95.46% | 34694.5369 | 36192.2431 | 0.02955665 | Ig gamma-1 chain C region                                                                                                                                     |
| BC073782.1         | 16.67% | 72.73% | 53097.2245 | 62296.6046 | 0.00109945 | cDNA clone MGC:88796 IMAGE:6295732, complete cds                                                                                                              |
| BC073793.1         | 33.33% | 77.27% | 13061.0668 | 13660.5893 | 0.01161727 | cDNA clone MGC:88813 IMAGE:6302307, complete cds                                                                                                              |
| BC073937.1         | 33.33% | 81.82% | 7218.87476 | 8315.32892 | 0.00484443 | immunoglobulin kappa constant, mRNA (cDNA clone MGC:90448 IMAGE:5226105), complete cds                                                                        |
| BC078670.1         | 33.33% | 72.73% | 31705.0886 | 35052.314  | 0.02416484 | immunoglobulin heavy constant gamma 1 (G1m marker), mRNA (cDNA clone MGC:88797 IMAGE:6295788), complete cds                                                   |
| BC092518.1         | 58.33% | 90.91% | 51483.6881 | 56383.912  | 0.03124079 | Ig gamma-1 chain C region                                                                                                                                     |
| BC095489.1         | 16.67% | 54.55% | 17284.7314 | 18949.645  | 0.02087528 | immunoglobulin kappa constant, mRNA (cDNA clone MGC:111575 IMAGE:30328747), complete cds                                                                      |
| BC096272.2         | 33.33% | 77.27% | 10256.9597 | 17416.5038 | 0.01161727 | HIV-1 Rev binding protein, mRNA (cDNA clone MGC:116938 IMAGE:40006445), complete cds                                                                          |
| BC099907.1         | 25%    | 77.27% | 55249.1599 | 62741.8482 | 0.00265472 | general transcription factor II-I                                                                                                                             |
| IGFBP6_Recombinant | 33.33% | 68.18% | 4122.08981 | 4804.45222 | 0.04507746 | IGFBP6 recombinant human protein                                                                                                                              |
| NM_000593.5        | 8.33%  | 45.46% | 528.271488 | 1105.95158 | 0.01173958 | transporter 1, ATP-binding cassette, sub-family B (MDR/TAP) (TAP1)                                                                                            |
| NM_001025100.1     | 25%    | 63.64% | 1665.66335 | 3239.32664 | 0.02508746 | myelin basic protein                                                                                                                                          |
| NM_001032293.1     | 16.67% | 54.55% | 17717.1465 | 30063.6859 | 0.02087528 | zinc finger protein 207 (ZNF207), transcript variant 2                                                                                                        |
| NM_001312.2        | 33.33% | 68.18% | 6439.58585 | 9350.98666 | 0.04507746 | cysteine-rich protein 2 (CRIP2)                                                                                                                               |
| NM_001860.1        | 8.33%  | 36.36% | 773.47464  | 1055.78263 | 0.0380784  | solute carrier family 31 (copper transporters), member 2 (SLC31A2)                                                                                            |
| NM_001983.1        | 8.33%  | 40.91% | 1162.27207 | 2030.45446 | 0.02152257 | excision repair cross-complementing rodent repair deficiency, complementation group 1 (includes overlapping antisense sequence) (ERCC1), transcript variant 2 |
| NM_002103.3        | 41.67% | 77.27% | 3556.46742 | 4017.64711 | 0.03870862 | glycogen synthase 1 (muscle) (GYS1)                                                                                                                           |
| NM_002625.1        | 8.33%  | 36.36% | 1547.23624 | 6489.90305 | 0.0380784  | 6-phosphofructo-2-kinase/fructose-2,6-biphosphatase 1                                                                                                         |

|             |        |        |            |            |            |                                                                                                              |
|-------------|--------|--------|------------|------------|------------|--------------------------------------------------------------------------------------------------------------|
| NM_002638.1 | 16.67% | 50%    | 1369.97487 | 1913.06652 | 0.03689584 | peptidase inhibitor 3, skin-derived (SKALP) (PI3)                                                            |
| NM_002904.4 | 58.33% | 95.46% | 30676.7318 | 34898.2601 | 0.00766284 | RD RNA binding protein (RDBP)                                                                                |
| NM_002945.2 | 33.33% | 72.73% | 27987.4399 | 31306.8207 | 0.02416484 | replication protein A1, 70 kDa (RPA1)                                                                        |
| NM_004202.1 | 25%    | 59.09% | 1265.71994 | 1948.08053 | 0.04457771 | thymosin beta-4, Y-chromosomal                                                                               |
| NM_004302   | 33.33% | 77.27% | 63759.8595 | 68998.1365 | 0.01161727 | activin R1b recombinant human protein                                                                        |
| NM_004329   | 16.67% | 72.73% | 48666.1222 | 57290.137  | 0.00109945 | BMPR1A recombinant human protein                                                                             |
| NM_004450.1 | 8.33%  | 36.36% | 1378.07195 | 2440.3009  | 0.0380784  | enhancer of rudimentary homolog ( <i>Drosophila</i> ) (ERH)                                                  |
| NM_004566.1 | 16.67% | 54.55% | 2267.29416 | 7240.49416 | 0.02087528 | 6-phosphofructo-2-kinase/fructose-2,6-biphosphatase 3 (PFKFB3)                                               |
| NM_004987.3 | 8.33%  | 45.46% | 67541.4438 | 70292.9132 | 0.01173958 | LIM and senescent cell antigen-like-containing domain protein 1                                              |
| NM_005510.2 | 50%    | 86.36% | 11890.6894 | 12612.3704 | 0.02564103 | dom-3 homolog Z ( <i>C. elegans</i> ) (DOM3Z)                                                                |
| NM_006413.2 | 8.33%  | 36.36% | 1657.80522 | 2085.72063 | 0.0380784  | ribonuclease P protein subunit p30                                                                           |
| NM_006790.1 | 8.33%  | 40.91% | 9282.31567 | 11029.2684 | 0.02152257 | myotilin (MYOT)                                                                                              |
| NM_006792.2 | 8.33%  | 45.46% | 885.325688 | 4555.077   | 0.01173958 | mortality factor 4 (MORF4), mRNA                                                                             |
| NM_007099.1 | 8.33%  | 40.91% | 1408.56951 | 1826.0404  | 0.02152257 | acid phosphatase 1, soluble (ACP1), transcript variant 2                                                     |
| NM_007162.1 | 8.33%  | 40.91% | 1569.44844 | 2517.03843 | 0.02152257 | transcription factor EB (TFEB)                                                                               |
| NM_013975.1 | 8.33%  | 45.46% | 2660.28757 | 4735.6742  | 0.01173958 | ligase III, DNA, ATP-dependent (LIG3), nuclear gene encoding mitochondrial protein, transcript variant alpha |
| NM_014049.3 | 8.33%  | 40.91% | 1748.76616 | 2188.59181 | 0.02152257 | acyl-coenzyme A dehydrogenase family, member 9 (ACAD9)                                                       |
| NM_014268.1 | 8.33%  | 45.46% | 771.745138 | 1670.59557 | 0.01173958 | microtubule-associated protein, RP/EB family, member 2 (MAPRE2)                                              |
| NM_014481.2 | 25%    | 77.27% | 50704.738  | 59300.2919 | 0.00265472 | APEX nuclease (apurinic/aprimidinic endonuclease) 2 (APEX2), nuclear gene encoding mitochondrial protein     |
| NM_014923.2 | 8.33%  | 54.55% | 1356.24474 | 2979.84535 | 0.00307465 | fibronectin type III domain containing 3A (FNDC3A), transcript variant 2                                     |
| NM_016564.1 | 25%    | 63.64% | 2048.59549 | 3091.0582  | 0.02508746 | cell cycle exit and neuronal differentiation 1 (CEND1)                                                       |
| NM_017451.1 | 33.33% | 81.82% | 9050.21611 | 9367.48708 | 0.00484443 | BAI1-associated protein 2 (BAIAP2), transcript variant 2                                                     |
| NM_017706.2 | 8.33%  | 36.36% | 1153.99859 | 1653.13306 | 0.0380784  | WD repeat-containing protein 55                                                                              |
| NM_017735.3 | 16.67% | 54.55% | 746.01178  | 804.122035 | 0.02087528 | tetratricopeptide repeat protein 27                                                                          |
| NM_018047.1 | 25%    | 59.09% | 4851.00548 | 4819.61219 | 0.04457771 | pre-mRNA-splicing factor RBM22                                                                               |
| NM_020992.2 | 66.67% | 95.46% | 3536.37724 | 3557.85099 | 0.02955665 | PDZ and LIM domain 1 (elfin) (PDLIM1)                                                                        |
| NM_022977.1 | 8.33%  | 50%    | 639.918285 | 1299.29725 | 0.00614931 | acyl-CoA synthetase long-chain family member 4 (ACSL4), transcript variant 2                                 |



|                |        |        |            |            |            |                                                                                    |
|----------------|--------|--------|------------|------------|------------|------------------------------------------------------------------------------------|
| NM_031469.1    | 8.33%  | 40.91% | 733.26459  | 1623.4096  | 0.02152257 | SH3 domain binding glutamic acid-rich protein like 2 (SH3BGRL2)                    |
| NM_032975.2    | 8.33%  | 40.91% | 1654.98553 | 2778.24497 | 0.02152257 | dystrobrevin, alpha (DTNA), transcript variant 2, mRNA                             |
| NM_053005.2    | 8.33%  | 54.55% | 2815.60617 | 4209.51162 | 0.00307465 | HCCA2 protein (HCCA2)                                                              |
| NM_078630.1    | 66.67% | 95.46% | 2858.25416 | 3313.10931 | 0.02955665 | male-specific lethal 3-like 1 ( <i>Drosophila</i> ) (MSL3L1), transcript variant 2 |
| NM_080548.1    | 8.33%  | 36.36% | 3210.77672 | 5727.81597 | 0.0380784  | tyrosine-protein phosphatase non-receptor type 6                                   |
| NM_130807.1    | 16.67% | 54.55% | 3780.46781 | 5514.13132 | 0.02087528 | MOB1, Mps one binder kinase activator-like 2A (yeast) (MOBKL2A)                    |
| NM_144578.1    | 8.33%  | 40.91% | 743.908335 | 1394.74235 | 0.02152257 | chromosome 14 open reading frame 32 (C14orf32)                                     |
| NM_145061.1    | 25%    | 59.09% | 1315.65955 | 1739.6403  | 0.04457771 | chromosome 13 open reading frame 3 (C13orf3)                                       |
| NM_145252.1    | 33.33% | 90.91% | 5727.20399 | 7926.82147 | 0.00041774 | similar to common salivary protein 1 (LOC124220)                                   |
| NM_145716.2    | 8.33%  | 36.36% | 3698.55666 | 9002.01724 | 0.0380784  | single stranded DNA binding protein 3 (SSBP3), transcript variant 1                |
| NM_173191.2    | 8.33%  | 59.09% | 244.098103 | 811.032206 | 0.04457771 | Kv channel interacting protein 2 (KCNI2), transcript variant 2                     |
| NM_173468.2    | 8.33%  | 40.91% | 1216.85016 | 1574.34065 | 0.02152257 | MOB1, Mps one binder kinase activator-like 1A (yeast) (MOBKL1A)                    |
| NM_175907.3    | 16.67% | 72.73% | 62610.5486 | 73700.5011 | 0.00109945 | zinc binding alcohol dehydrogenase, domain containing 2 (ZADH2)                    |
| NM_177973.1    | 16.67% | 54.55% | 3737.01917 | 2078.94662 | 0.02087528 | sulfotransferase family, cytosolic, 2B, member 1 (SULT2B1), transcript variant 2   |
| NM_178044.1    | 8.33%  | 40.91% | 637.761772 | 889.252908 | 0.02152257 | GIY-YIG domain containing 2 (GIYD2), transcript variant 2                          |
| NM_178553.2    | 8.33%  | 36.36% | 12927.2234 | 19337.4665 | 0.0380784  | uncharacterized protein C2orf53                                                    |
| NM_199129.1    | 16.67% | 50%    | 909.687517 | 1262.53088 | 0.03689584 | transmembrane protein 189                                                          |
| NP_000205.1    | 16.67% | 72.73% | 51919.1052 | 61117.9457 | 0.00109945 | JAG1/JAGL1/CD339 protein                                                           |
| NP_000408.1    | 16.67% | 68.18% | 56117.1426 | 64188.1274 | 0.0025987  | IL2Ra/CD25 protein                                                                 |
| NP_000582.1    | 16.67% | 72.73% | 49196.9142 | 57782.0829 | 0.00109945 | CD14 protein                                                                       |
| NP_000868.1    | 16.67% | 72.73% | 51466.8807 | 63242.0236 | 0.00109945 | IL1R1/CD121a protein                                                               |
| NP_001018016.1 | 16.67% | 72.73% | 53737.3637 | 63261.689  | 0.00109945 | mucin-1/MUC-1 protein (Fc tag)                                                     |
| NP_001108225.1 | 16.67% | 63.64% | 57181.0678 | 64209.546  | 0.0055972  | endoglin/CD105/ENG protein                                                         |
| NP_001183.2    | 16.67% | 68.18% | 33528.8887 | 41882.1955 | 0.0025987  | TNFRSF17/BCMA/CD269 protein                                                        |
| NP_001775.2    | 16.67% | 68.18% | 56511.0379 | 64611.5322 | 0.0025987  | CD97 protein                                                                       |
| NP_001954.2    | 16.67% | 68.18% | 53789.7786 | 65004.6823 | 0.0025987  | EGF/epidermal growth factor protein                                                |

|             |        |        |            |            |            |                                       |
|-------------|--------|--------|------------|------------|------------|---------------------------------------|
| NP_002167.1 | 16.67% | 72.73% | 48630.2868 | 57263.4877 | 0.00109945 | interferon beta/IFN-beta/IFNB protein |
| NP_002174.1 | 16.67% | 72.73% | 57180.8465 | 67162.1144 | 0.00109945 | IL3RA/CD123 protein                   |
| NP_003833.3 | 16.67% | 63.64% | 48845.1411 | 55552.307  | 0.0055972  | TNFRSF10B/TRAILR2/CD262 protein       |
| NP_004084.1 | 16.67% | 63.64% | 67075.0351 | 73317.2316 | 0.0055972  | ephrin B2/EFNB2 protein               |
| NP_004834.1 | 16.67% | 72.73% | 51263.7699 | 60347.4354 | 0.00109945 | IL27Ra/TCCR/WSX1 protein              |
| NP_006262.1 | 25%    | 86.36% | 49594.7141 | 58104.2789 | 0.00029126 | S100A1 protein                        |
| NP_054862.1 | 16.67% | 68.18% | 51758.1762 | 58956.1544 | 0.0025987  | PD-L1 protein                         |
| NP_061947.1 | 16.67% | 68.18% | 58248.5808 | 65031.6355 | 0.0025987  | DLL4 protein                          |
| NP_068576.1 | 16.67% | 72.73% | 52394.6963 | 61677.3535 | 0.00109945 | ACE2/ACEH protein                     |
| NP_079515.2 | 8.33%  | 63.64% | 51984.9227 | 62947.9699 | 0.0006473  | PD-L2/B7-DC/CD273 protein             |
| P01566      | 16.67% | 72.73% | 55034.8723 | 64785.6783 | 0.00109945 | interferon alpha 10/IFNA10 protein    |
| P01567      | 25%    | 81.82% | 56287.6763 | 66801.0376 | 0.00097424 | interferon alpha 7/IFNA7 protein      |
| PV3835      | 8.33%  | 50%    | 256.498926 | 748.716233 | 0.00614931 | MLCK protein (MLCK)                   |
| XM_376764.2 | 8.33%  | 36.36% | 780.890847 | 1308.4105  | 0.0380784  | paraneoplastic antigen MA2 (PNMA2)    |

---

**Supplementary Figure 1: CiEnCs acquire an endothelial phenotype after 7 days of culture at 37°C.** The CiEnC phenotype was analyzed before (33°C) and after differentiation (37°C for 7 days) and compared to primary human glomerular microvascular ECs (GEnC) (Cell Systems, ACBRI 128, Kirkland, WA, USA). **(A.)** Quantitative PCR analysis of *VEGFR2*, *ICAM2*, *PECAM1* and *VE-cadherin*. N=6-9, \*\*\*P<0.001 and \*\*\*\*P<0.0001, Mann-Whitney test **(B.)** FACS analysis of *VEGFR2*, *PECAM1*, *ICAM2*, and *VE-cadherin*. N=3-8, \*P<0.05 and \*\*\*P<0.001, Mann-Whitney test. **(C.)** Immunofluorescence staining for *PECAM1* and *VE-cadherin*.

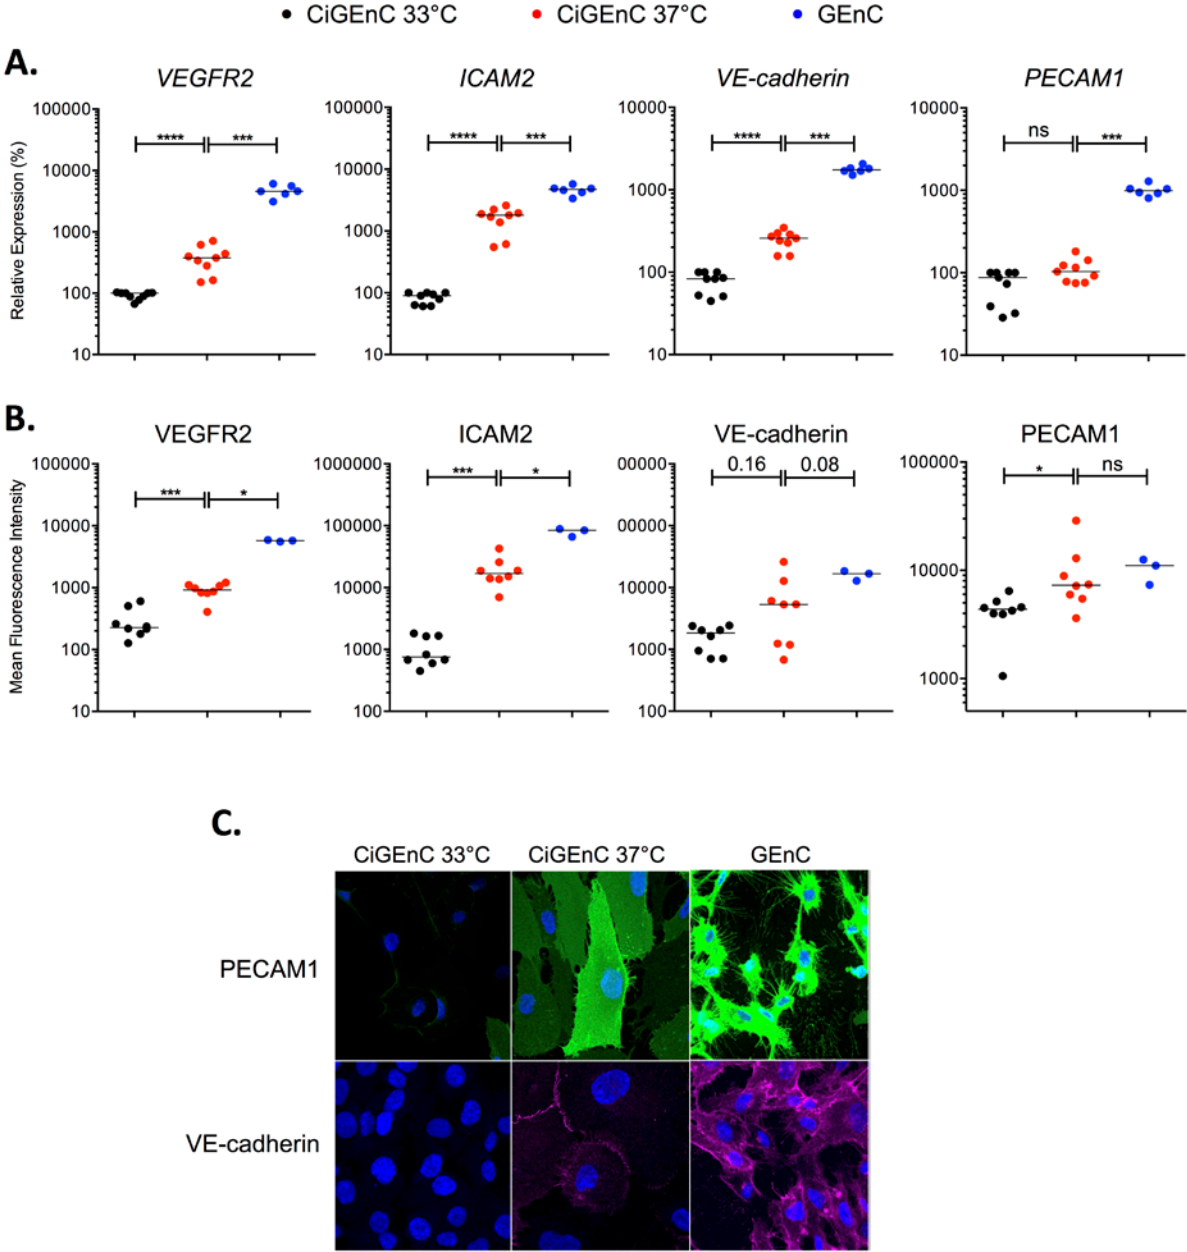

**Supplementary Figure 2: Cytokine stimulation increases HLA expression in CiGenCs.** After 7 days of differentiation, CiGenCs were challenged with TNF- $\alpha$  (100 IU/mL, Miltenyi Biotec) and IFN- $\gamma$  (100 IU/mL, Miltenyi Biotec) and harvested after 24 h for RT-qPCR analysis and 48 h for both FACS and immunofluorescence analyses. **(A.)** Quantitative PCR analysis of *CIITA* (class II, major histocompatibility complex, transactivator) and *B2M* ( $\beta$ 2-microglobulin). \*\*\*\* $P \leq 0.0001$ , Mann-Whitney test **(B.)** FACS analysis of HLA-ABC and HLA-DR **(C.)** Immunofluorescence staining for HLA class I and HLA class II.

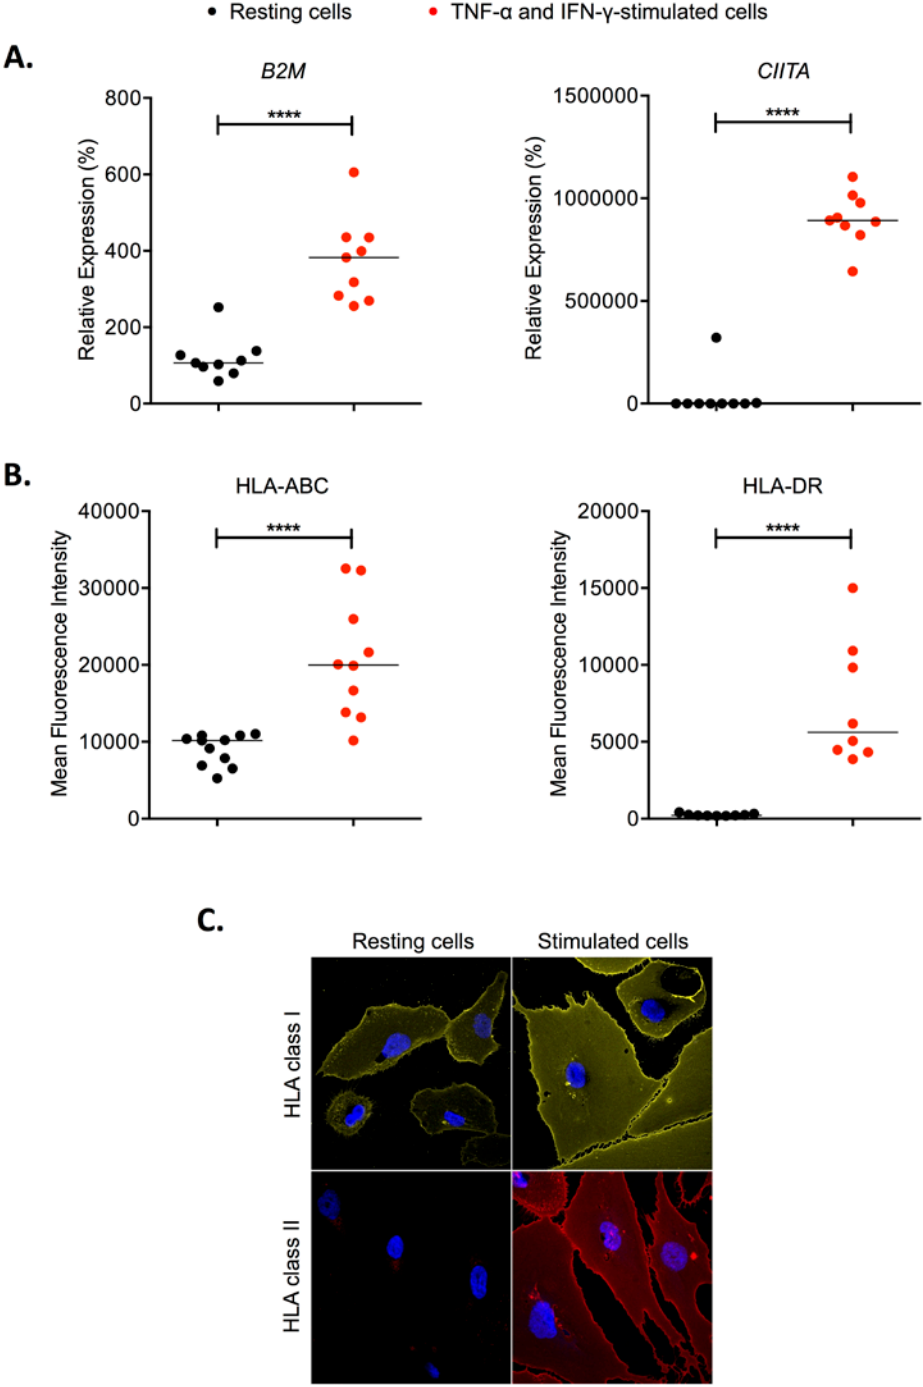

**Supplementary Figure 3: Venn diagram illustrating the number of differentially expressed genes between microvascular ECs and macrovascular ECs determined using three statistical methods.** The DEseq2 method identified 2762 genes (blue), the edgeR method identified 1311 genes (red) and the LimmaVoom method identified 2359 genes (green). Most of the genes were identified by two methods (U=upregulated genes and D=downregulated genes).

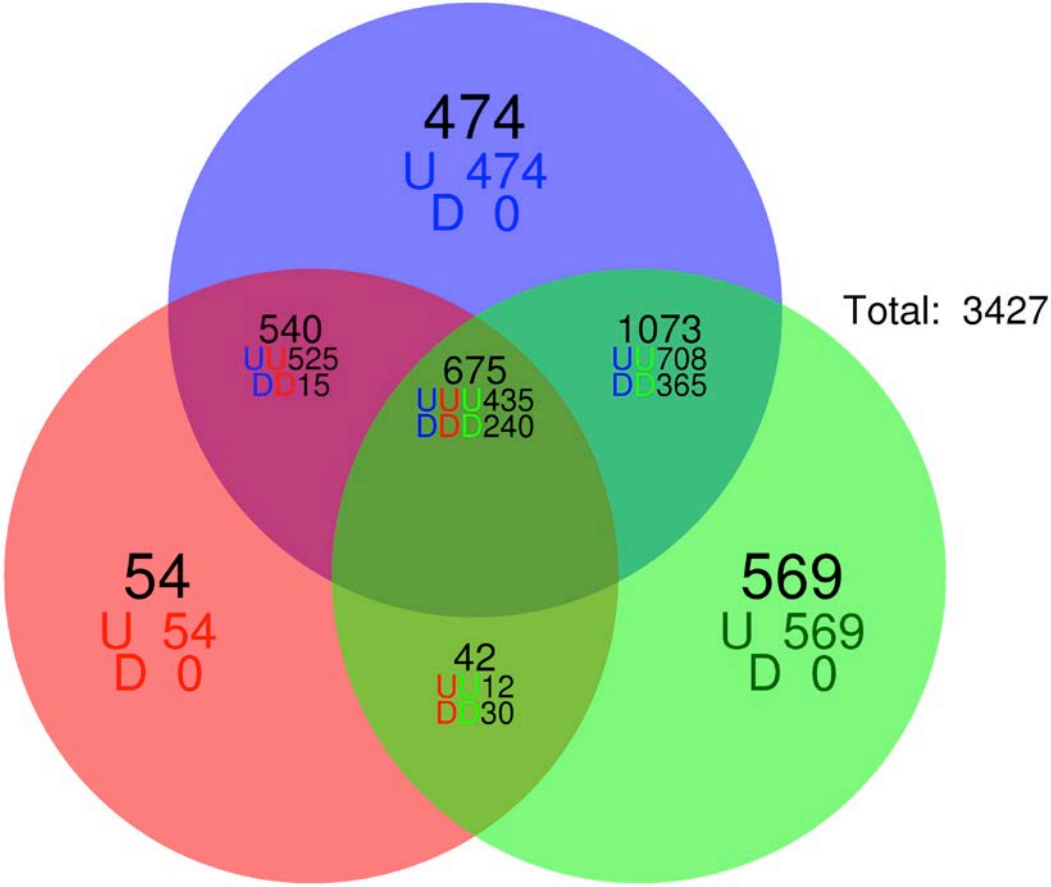

**Supplementary Figure 4: Validation of antigen expression in micro and macrovascular ECs.**

(A.) CiGenCs were analyzed after culture in differentiation media (37°C for 7 days) and compared to primary cultures of human macrovascular ECs (HAECs). Quantitative PCR analysis of *MBP*, *BMPR1A*, *EPHB6* and *LMOD1*. Gene expression levels were normalized to *GAPDH*, *HPRT1* and *18S*. P values were determined using the Mann-Whitney test (B.) Western blot analyses of MBP, BMPR1A, EPHB6, LMOD1 and GAPDH. (C.) Immunofluorescence staining for MBP, BMPR1a, EPHB6 and LMOD1.

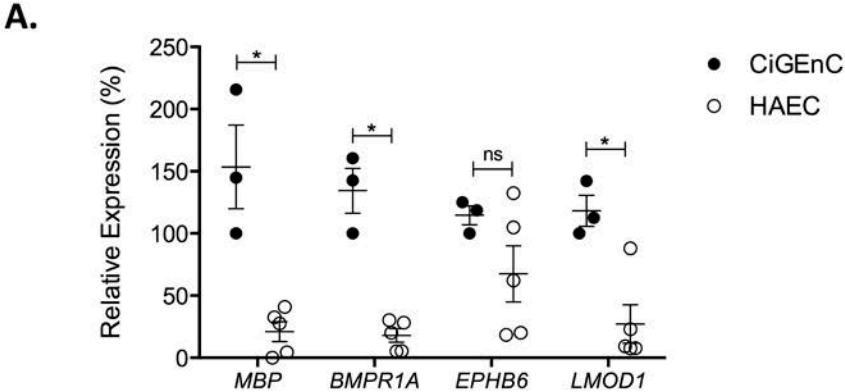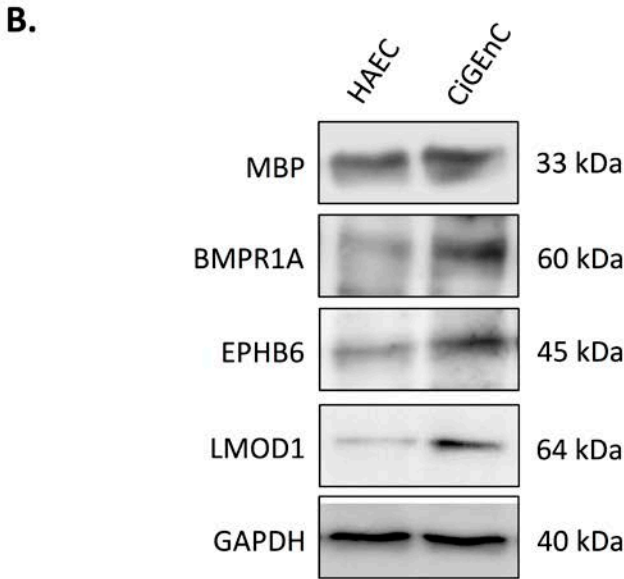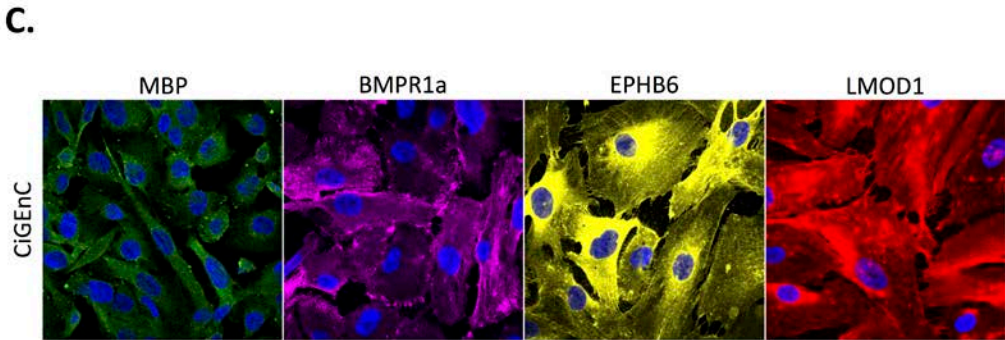

Supplement: ASN.2018080868SupplementaryData.pdf [file ASN.2018080868SupplementaryData.pdf]
